# Supplementary material
Source: publisher figshare collection journal article supplement (https://acs.figshare.com/ndownloader/files/4736701)
Supplement: Supplementary file 1 [file 4736701]

data_Global
_audit_creation_method            SHELXL-97 
#------------------------------------------------------------------------------
_publ_contact_author
;
    Masood Parvez
    Department of Chemistry
    University of Calgary
    2500 University Drive N.W.
    Calgary, Alberta, Canada T2N 1N4  
;
#-----------------------------------------------------------------------------
_publ_requested_journal               ' ? '
_publ_requested_coeditor_name         ' ? '
_publ_contact_author_phone            ' (403)220-5348 '
_publ_contact_author_fax              ' (403)289-9488 '
_publ_contact_author_email            ' parvez@ucalgary.ca '
#------------------------------------------------------------------------------
_publ_section_title   
;
?
;

loop_
_publ_author_name
_publ_author_address
 'Parvez, Masood'
; Department of Chemistry
The University of Calgary
2500 University Drive NW
Calgary
Alberta
Canada 
T2N 1N4
;
#------------------------------------------------------------------------------
data_Compound_I
#-----------------------------------------------------------------------------
_computing_data_collection                           'COLLECT (Hooft, 1998)'
_computing_cell_refinement            'HKL DENZO (Otwinowski & Minor, 1997)'
_computing_data_reduction             'SCALEPACK (Otwinowski & Minor, 1997)'
_computing_structure_solution                           'SAPI91 (Fan, 1991)'
_computing_structure_refinement                'SHELXL-97 (Sheldrick, 1997)'
_computing_publication_material                'SHELXL-97 (Sheldrick, 1997)'
_computing_molecular_graphics                      'ORTEPII (Johnson, 1976)'
#-----------------------------------------------------------------------------
_chemical_name_systematic
;
 ?
;
_chemical_name_common             ?
_chemical_melting_point           ?
_chemical_formula_moiety          ?
_chemical_formula_sum
 'C43 H43 B Cl F20 P4 W'
_chemical_formula_weight          1293.76
 
loop_
 _atom_type_symbol
 _atom_type_description
 _atom_type_scat_dispersion_real
 _atom_type_scat_dispersion_imag
 _atom_type_scat_source
 'C'  'C'   0.0033   0.0016
 'International Tables Vol C Tables 4.2.6.8 and 6.1.1.4'
 'H'  'H'   0.0000   0.0000
 'International Tables Vol C Tables 4.2.6.8 and 6.1.1.4'
 'B'  'B'   0.0013   0.0007
 'International Tables Vol C Tables 4.2.6.8 and 6.1.1.4'
 'Cl'  'Cl'   0.1484   0.1585
 'International Tables Vol C Tables 4.2.6.8 and 6.1.1.4'
 'F'  'F'   0.0171   0.0103
 'International Tables Vol C Tables 4.2.6.8 and 6.1.1.4'
 'P'  'P'   0.1023   0.0942
 'International Tables Vol C Tables 4.2.6.8 and 6.1.1.4'
 'W'  'W'  -0.8490   6.8722
 'International Tables Vol C Tables 4.2.6.8 and 6.1.1.4'
 
_symmetry_cell_setting             'Triclinic'
_symmetry_space_group_name_H-M     'P -1'
_symmetry_space_group_name_Hall    '-P 1'
 
loop_
 _symmetry_equiv_pos_as_xyz
 'x, y, z'
 '-x, -y, -z'
 
_cell_length_a                    13.667(2)
_cell_length_b                    14.036(3)
_cell_length_c                    15.665(2)
_cell_angle_alpha                 64.577(8)
_cell_angle_beta                  68.486(9)
_cell_angle_gamma                 73.640(8)
_cell_volume                      2497.2(7)
_cell_formula_units_Z             2
_cell_measurement_temperature     123(2)
_cell_measurement_reflns_used     27288
_cell_measurement_theta_min       3.0
_cell_measurement_theta_max       30.0
 
_exptl_crystal_description        'prism'
_exptl_crystal_colour             'green'
_exptl_crystal_size_max           0.10
_exptl_crystal_size_mid           0.08
_exptl_crystal_size_min           0.07
_exptl_crystal_density_meas       'not measured'
_exptl_crystal_density_diffrn     1.721
_exptl_crystal_density_method     'not measured'
_exptl_crystal_F_000              1274
_exptl_absorpt_coefficient_mu     2.601
_exptl_absorpt_correction_type    'multi-scan'
_exptl_absorpt_correction_T_min   0.7810
_exptl_absorpt_correction_T_max   0.8389
_exptl_absorpt_process_details    'SORTAV: (Blessing, 1997)'

_diffrn_ambient_temperature       123(2)
_diffrn_radiation_wavelength      0.71073
_diffrn_radiation_type            MoK\a
_diffrn_radiation_source          'fine-focus sealed tube'
_diffrn_radiation_monochromator   graphite
_diffrn_measurement_device_type   'Nonius KappaCCD' 
_diffrn_measurement_method        ' \w and \f '
_diffrn_detector_area_resol_mean  ?
_diffrn_standards_number          ?
_diffrn_standards_interval_count  ?
_diffrn_standards_interval_time   ?
_diffrn_standards_decay_%         ?
_diffrn_reflns_number             27288
_diffrn_reflns_av_R_equivalents   0.0311
_diffrn_reflns_av_sigmaI/netI     0.0450
_diffrn_reflns_limit_h_min        -18
_diffrn_reflns_limit_h_max        19
_diffrn_reflns_limit_k_min        -19
_diffrn_reflns_limit_k_max        19
_diffrn_reflns_limit_l_min        -22
_diffrn_reflns_limit_l_max        22
_diffrn_reflns_theta_min          2.98
_diffrn_reflns_theta_max          30.00
_reflns_number_total              14484
_reflns_number_gt                 12028
_reflns_threshold_expression      >2sigma(I)
 
_refine_ls_structure_factor_coef  Fsqd  
_refine_ls_matrix_type            full 
_refine_ls_weighting_scheme       calc  
_refine_ls_weighting_details 
 'calc w=1/[\s^2^(Fo^2^)+(0.0200P)^2^+3.5600P] where P=(Fo^2^+2Fc^2^)/3' 
_atom_sites_solution_primary      direct 
_atom_sites_solution_secondary    difmap 
_atom_sites_solution_hydrogens    geom 
_refine_ls_hydrogen_treatment     'constr' 
_refine_ls_extinction_method      none 
_refine_ls_extinction_coef        ? 
_refine_ls_number_reflns          14484 
_refine_ls_number_parameters      656 
_refine_ls_number_restraints      0 
_refine_ls_R_factor_all           0.0513 
_refine_ls_R_factor_gt            0.0366 
_refine_ls_wR_factor_ref          0.0757 
_refine_ls_wR_factor_gt           0.0697 
_refine_ls_goodness_of_fit_ref    1.055 
_refine_ls_restrained_S_all       1.055 
_refine_ls_shift/su_max           0.002 
_refine_ls_shift/su_mean          0.000 
 
loop_ 
 _atom_site_label 
 _atom_site_type_symbol 
 _atom_site_fract_x 
 _atom_site_fract_y 
 _atom_site_fract_z 
 _atom_site_U_iso_or_equiv 
 _atom_site_adp_type 
 _atom_site_occupancy 
 _atom_site_symmetry_multiplicity 
 _atom_site_calc_flag 
 _atom_site_refinement_flags 
 _atom_site_disorder_assembly 
 _atom_site_disorder_group 
W1 W 0.417853(9) 0.749491(11) 0.038972(9) 0.02951(4) Uani 1 1 d . . . 
Cl1 Cl 0.4215(2) 0.57019(17) 0.05673(18) 0.0338(4) Uani 0.50 1 d P . . 
Cl2 Cl 0.4155(2) 0.92948(19) 0.0217(2) 0.0420(5) Uani 0.50 1 d P . . 
C01 C 0.4140(9) 0.6137(7) 0.0514(8) 0.039(2) Uani 0.50 1 d P . . 
H01 H 0.4120 0.5438 0.0578 0.047 Uiso 0.50 1 calc PR . . 
C02 C 0.4165(9) 0.8908(7) 0.0231(9) 0.042(2) Uani 0.50 1 d P . . 
H02 H 0.4159 0.9620 0.0151 0.050 Uiso 0.50 1 calc PR . . 
P1 P 0.61756(6) 0.75130(7) -0.02830(6) 0.03071(17) Uani 1 1 d . . . 
P2 P 0.21842(6) 0.79370(7) 0.10604(6) 0.03198(17) Uani 1 1 d . . . 
P3 P 0.43498(6) 0.65862(6) 0.21248(5) 0.02600(15) Uani 1 1 d . . . 
P4 P 0.40397(6) 0.78979(7) -0.13022(6) 0.03237(17) Uani 1 1 d . . . 
F1 F 1.00851(14) 0.17687(14) 0.33256(12) 0.0322(4) Uani 1 1 d . . . 
F2 F 1.07962(15) 0.11337(16) 0.17931(14) 0.0397(4) Uani 1 1 d . . . 
F3 F 1.02782(16) 0.23948(18) 0.00871(14) 0.0453(5) Uani 1 1 d . . . 
F4 F 0.90188(15) 0.43214(16) -0.00481(12) 0.0396(4) Uani 1 1 d . . . 
F5 F 0.82520(13) 0.49458(14) 0.14638(12) 0.0305(4) Uani 1 1 d . . . 
F6 F 1.11137(13) 0.36348(15) 0.24632(12) 0.0326(4) Uani 1 1 d . . . 
F7 F 1.25395(13) 0.36659(16) 0.31940(14) 0.0373(4) Uani 1 1 d . . . 
F8 F 1.19854(15) 0.37343(16) 0.50351(15) 0.0402(4) Uani 1 1 d . . . 
F9 F 0.99031(16) 0.37284(16) 0.61388(12) 0.0379(4) Uani 1 1 d . . . 
F10 F 0.84283(13) 0.37329(14) 0.53961(11) 0.0303(4) Uani 1 1 d . . . 
F11 F 0.68330(13) 0.35069(14) 0.31818(12) 0.0306(4) Uani 1 1 d . . . 
F12 F 0.54641(14) 0.21187(16) 0.42963(15) 0.0411(5) Uani 1 1 d . . . 
F13 F 0.57275(17) 0.05932(17) 0.60413(16) 0.0519(6) Uani 1 1 d . . . 
F14 F 0.74722(18) 0.04348(16) 0.65801(14) 0.0465(5) Uani 1 1 d . . . 
F15 F 0.88911(14) 0.17314(14) 0.54496(12) 0.0331(4) Uani 1 1 d . . . 
F16 F 0.64945(13) 0.43853(14) 0.47477(12) 0.0295(4) Uani 1 1 d . . . 
F17 F 0.56021(13) 0.63706(15) 0.45042(13) 0.0353(4) Uani 1 1 d . . . 
F18 F 0.65571(15) 0.80325(15) 0.29923(15) 0.0393(4) Uani 1 1 d . . . 
F19 F 0.85321(15) 0.76328(15) 0.18121(13) 0.0383(4) Uani 1 1 d . . . 
F20 F 0.94893(13) 0.56175(14) 0.20701(12) 0.0299(4) Uani 1 1 d . . . 
C1 C 0.6756(3) 0.7836(3) 0.0421(3) 0.0397(8) Uani 1 1 d . . . 
H1A H 0.7491 0.7960 0.0046 0.048 Uiso 1 1 calc R . . 
H1B H 0.6750 0.7242 0.1051 0.048 Uiso 1 1 calc R . . 
H1C H 0.6340 0.8481 0.0545 0.048 Uiso 1 1 calc R . . 
C2 C 0.7046(3) 0.6326(3) -0.0448(3) 0.0414(8) Uani 1 1 d . . . 
H2A H 0.7786 0.6456 -0.0711 0.050 Uiso 1 1 calc R . . 
H2B H 0.6867 0.6151 -0.0909 0.050 Uiso 1 1 calc R . . 
H2C H 0.6954 0.5731 0.0189 0.050 Uiso 1 1 calc R . . 
C3 C 0.6575(3) 0.8579(3) -0.1471(3) 0.0513(10) Uani 1 1 d . . . 
H3A H 0.7344 0.8573 -0.1661 0.062 Uiso 1 1 calc R . . 
H3B H 0.6200 0.9268 -0.1420 0.062 Uiso 1 1 calc R . . 
H3C H 0.6395 0.8470 -0.1970 0.062 Uiso 1 1 calc R . . 
C4 C 0.1358(3) 0.6940(3) 0.1445(3) 0.0469(9) Uani 1 1 d . . . 
H4A H 0.0611 0.7229 0.1676 0.056 Uiso 1 1 calc R . . 
H4B H 0.1560 0.6308 0.1981 0.056 Uiso 1 1 calc R . . 
H4C H 0.1456 0.6743 0.0887 0.056 Uiso 1 1 calc R . . 
C5 C 0.1751(3) 0.8351(3) 0.2116(3) 0.0461(9) Uani 1 1 d . . . 
H5A H 0.0977 0.8554 0.2292 0.055 Uiso 1 1 calc R . . 
H5B H 0.2091 0.8963 0.1945 0.055 Uiso 1 1 calc R . . 
H5C H 0.1954 0.7760 0.2677 0.055 Uiso 1 1 calc R . . 
C6 C 0.1570(3) 0.9110(4) 0.0224(3) 0.0576(11) Uani 1 1 d . . . 
H6A H 0.0809 0.9250 0.0547 0.069 Uiso 1 1 calc R . . 
H6B H 0.1663 0.8985 -0.0373 0.069 Uiso 1 1 calc R . . 
H6C H 0.1906 0.9727 0.0045 0.069 Uiso 1 1 calc R . . 
C7 C 0.5514(3) 0.5582(3) 0.2299(2) 0.0376(7) Uani 1 1 d . . . 
H7A H 0.5435 0.5197 0.3005 0.045 Uiso 1 1 calc R . . 
H7B H 0.6152 0.5930 0.1992 0.045 Uiso 1 1 calc R . . 
H7C H 0.5581 0.5079 0.1992 0.045 Uiso 1 1 calc R . . 
C8 C 0.3343(3) 0.5731(3) 0.2956(2) 0.0365(7) Uani 1 1 d . . . 
H8A H 0.3442 0.5405 0.3617 0.044 Uiso 1 1 calc R . . 
H8B H 0.3408 0.5170 0.2716 0.044 Uiso 1 1 calc R . . 
H8C H 0.2635 0.6157 0.2984 0.044 Uiso 1 1 calc R . . 
C9 C 0.4316(3) 0.7413(3) 0.2764(3) 0.0397(8) Uani 1 1 d . . . 
H9A H 0.4340 0.6962 0.3440 0.048 Uiso 1 1 calc R . . 
H9B H 0.3660 0.7926 0.2779 0.048 Uiso 1 1 calc R . . 
H9C H 0.4931 0.7797 0.2418 0.048 Uiso 1 1 calc R . . 
C10 C 0.5105(3) 0.7186(4) -0.2015(3) 0.0492(9) Uani 1 1 d . . . 
H10A H 0.4937 0.7306 -0.2613 0.059 Uiso 1 1 calc R . . 
H10B H 0.5177 0.6422 -0.1619 0.059 Uiso 1 1 calc R . . 
H10C H 0.5774 0.7448 -0.2196 0.059 Uiso 1 1 calc R . . 
C11 C 0.2908(3) 0.7448(4) -0.1292(3) 0.0492(9) Uani 1 1 d . . . 
H11A H 0.2950 0.7568 -0.1968 0.059 Uiso 1 1 calc R . . 
H11B H 0.2247 0.7848 -0.1011 0.059 Uiso 1 1 calc R . . 
H11C H 0.2919 0.6685 -0.0892 0.059 Uiso 1 1 calc R . . 
C12 C 0.3968(3) 0.9272(3) -0.2153(3) 0.0539(10) Uani 1 1 d . . . 
H12A H 0.3937 0.9304 -0.2780 0.065 Uiso 1 1 calc R . . 
H12B H 0.4599 0.9559 -0.2266 0.065 Uiso 1 1 calc R . . 
H12C H 0.3328 0.9697 -0.1873 0.065 Uiso 1 1 calc R . . 
C13 C 0.9149(2) 0.3403(2) 0.24832(19) 0.0227(5) Uani 1 1 d . . . 
C14 C 0.9794(2) 0.2435(2) 0.2500(2) 0.0254(6) Uani 1 1 d . . . 
C15 C 1.0178(2) 0.2089(3) 0.1720(2) 0.0291(6) Uani 1 1 d . . . 
C16 C 0.9919(2) 0.2724(3) 0.0853(2) 0.0311(7) Uani 1 1 d . . . 
C17 C 0.9288(2) 0.3690(3) 0.0788(2) 0.0287(6) Uani 1 1 d . . . 
C18 C 0.8908(2) 0.4002(2) 0.1594(2) 0.0243(5) Uani 1 1 d . . . 
C19 C 0.9676(2) 0.3638(2) 0.39074(19) 0.0224(5) Uani 1 1 d . . . 
C20 C 1.0744(2) 0.3654(2) 0.3385(2) 0.0253(6) Uani 1 1 d . . . 
C21 C 1.1515(2) 0.3686(2) 0.3749(2) 0.0289(6) Uani 1 1 d . . . 
C22 C 1.1251(2) 0.3704(2) 0.4673(2) 0.0293(6) Uani 1 1 d . . . 
C23 C 1.0196(2) 0.3709(2) 0.5223(2) 0.0285(6) Uani 1 1 d . . . 
C24 C 0.9454(2) 0.3693(2) 0.4829(2) 0.0254(6) Uani 1 1 d . . . 
C25 C 0.7924(2) 0.2738(2) 0.42631(19) 0.0233(5) Uani 1 1 d . . . 
C26 C 0.7039(2) 0.2741(2) 0.4020(2) 0.0264(6) Uani 1 1 d . . . 
C27 C 0.6307(2) 0.2045(3) 0.4583(2) 0.0313(6) Uani 1 1 d . . . 
C28 C 0.6444(3) 0.1271(3) 0.5456(2) 0.0356(7) Uani 1 1 d . . . 
C29 C 0.7319(3) 0.1196(3) 0.5727(2) 0.0332(7) Uani 1 1 d . . . 
C30 C 0.8044(2) 0.1901(2) 0.5129(2) 0.0271(6) Uani 1 1 d . . . 
C31 C 0.8033(2) 0.4877(2) 0.33856(18) 0.0216(5) Uani 1 1 d . . . 
C32 C 0.7048(2) 0.5151(2) 0.39869(19) 0.0238(5) Uani 1 1 d . . . 
C33 C 0.6556(2) 0.6178(2) 0.3879(2) 0.0264(6) Uani 1 1 d . . . 
C34 C 0.7040(2) 0.7020(2) 0.3132(2) 0.0289(6) Uani 1 1 d . . . 
C35 C 0.8039(2) 0.6808(2) 0.2531(2) 0.0278(6) Uani 1 1 d . . . 
C36 C 0.8504(2) 0.5770(2) 0.26752(19) 0.0247(6) Uani 1 1 d . . . 
B1 B 0.8701(2) 0.3668(3) 0.3509(2) 0.0225(6) Uani 1 1 d . . . 
C37 C 0.8888(3) 0.9473(5) 0.3847(3) 0.0665(19) Uani 0.748(6) 1 d PG A 1 
D37 H 0.9522 0.9723 0.3372 0.080 Uiso 0.748(6) 1 calc PR A 1 
C38 C 0.8735(3) 0.9250(5) 0.4838(3) 0.0483(11) Uani 0.748(6) 1 d PG A 1 
D38 H 0.9264 0.9348 0.5039 0.058 Uiso 0.748(6) 1 calc PR A 1 
C39 C 0.7808(3) 0.8883(3) 0.5534(2) 0.0497(13) Uani 0.748(6) 1 d PG A 1 
D39 H 0.7703 0.8731 0.6211 0.060 Uiso 0.748(6) 1 calc PR A 1 
C40 C 0.7033(3) 0.8740(3) 0.5240(3) 0.0518(14) Uani 0.748(6) 1 d PG A 1 
D40 H 0.6400 0.8489 0.5715 0.062 Uiso 0.748(6) 1 calc PR A 1 
C41 C 0.7186(3) 0.8963(4) 0.4249(3) 0.0620(18) Uani 0.748(6) 1 d PG A 1 
D41 H 0.6657 0.8864 0.4047 0.074 Uiso 0.748(6) 1 calc PR A 1 
C42 C 0.8114(4) 0.9329(4) 0.3553(2) 0.074(2) Uani 0.748(6) 1 d PG A 1 
D42 H 0.8218 0.9482 0.2876 0.089 Uiso 0.748(6) 1 calc PR A 1 
C37' C 0.9254(10) 0.9605(16) 0.3795(10) 0.0665(19) Uani 0.252(6) 1 d PG A 2 
D37' H 0.9906 0.9855 0.3612 0.080 Uiso 0.252(6) 1 calc PR A 2 
C38' C 0.8657(11) 0.9262(15) 0.4778(9) 0.0483(11) Uani 0.252(6) 1 d PG A 2 
D38' H 0.8901 0.9277 0.5267 0.058 Uiso 0.252(6) 1 calc PR A 2 
C39' C 0.7702(9) 0.8896(10) 0.5047(7) 0.0497(13) Uani 0.252(6) 1 d PG A 2 
D39' H 0.7294 0.8661 0.5719 0.060 Uiso 0.252(6) 1 calc PR A 2 
C40' C 0.7345(10) 0.8873(12) 0.4332(10) 0.0518(14) Uani 0.252(6) 1 d PG A 2 
D40' H 0.6692 0.8623 0.4516 0.062 Uiso 0.252(6) 1 calc PR A 2 
C41' C 0.7942(12) 0.9217(13) 0.3349(9) 0.0620(18) Uani 0.252(6) 1 d PG A 2 
D41' H 0.7697 0.9202 0.2861 0.074 Uiso 0.252(6) 1 calc PR A 2 
C42' C 0.8896(11) 0.9583(13) 0.3081(8) 0.074(2) Uani 0.252(6) 1 d PG A 2 
D42' H 0.9304 0.9818 0.2409 0.089 Uiso 0.252(6) 1 calc PR A 2 
 
loop_ 
 _atom_site_aniso_label 
 _atom_site_aniso_U_11 
 _atom_site_aniso_U_22 
 _atom_site_aniso_U_33 
 _atom_site_aniso_U_23 
 _atom_site_aniso_U_13 
 _atom_site_aniso_U_12 
W1 0.02051(6) 0.04247(8) 0.02196(6) -0.00787(5) -0.00504(4) -0.00701(5) 
Cl1 0.0455(10) 0.0299(12) 0.0272(8) -0.0122(10) -0.0080(7) -0.0077(10) 
Cl2 0.0442(10) 0.0255(13) 0.0610(12) -0.0152(12) -0.0202(9) -0.0059(11) 
C01 0.053(5) 0.025(5) 0.045(5) -0.021(5) -0.016(3) 0.003(5) 
C02 0.044(4) 0.014(5) 0.066(6) -0.017(5) -0.013(4) -0.002(4) 
P1 0.0217(3) 0.0389(5) 0.0249(4) -0.0042(3) -0.0044(3) -0.0099(3) 
P2 0.0218(3) 0.0423(5) 0.0336(4) -0.0170(4) -0.0075(3) -0.0028(3) 
P3 0.0261(3) 0.0310(4) 0.0212(3) -0.0104(3) -0.0063(3) -0.0040(3) 
P4 0.0283(4) 0.0431(5) 0.0223(4) -0.0055(3) -0.0084(3) -0.0090(3) 
F1 0.0348(9) 0.0342(10) 0.0281(9) -0.0130(8) -0.0134(7) 0.0027(7) 
F2 0.0358(10) 0.0439(11) 0.0458(11) -0.0297(10) -0.0123(8) 0.0075(8) 
F3 0.0445(11) 0.0653(14) 0.0346(10) -0.0348(10) -0.0073(9) 0.0011(10) 
F4 0.0452(11) 0.0531(12) 0.0217(8) -0.0140(8) -0.0127(8) -0.0041(9) 
F5 0.0324(9) 0.0341(10) 0.0245(8) -0.0105(7) -0.0116(7) 0.0005(7) 
F6 0.0231(8) 0.0529(12) 0.0258(8) -0.0223(8) 0.0031(7) -0.0121(8) 
F7 0.0197(8) 0.0478(12) 0.0490(11) -0.0231(9) -0.0066(8) -0.0071(8) 
F8 0.0399(10) 0.0464(12) 0.0486(11) -0.0186(9) -0.0264(9) -0.0064(9) 
F9 0.0512(11) 0.0451(11) 0.0236(8) -0.0138(8) -0.0146(8) -0.0089(9) 
F10 0.0268(8) 0.0424(10) 0.0191(8) -0.0143(7) -0.0008(6) -0.0039(7) 
F11 0.0283(8) 0.0354(10) 0.0279(8) -0.0065(7) -0.0127(7) -0.0063(7) 
F12 0.0294(9) 0.0505(12) 0.0503(12) -0.0192(10) -0.0105(8) -0.0155(9) 
F13 0.0474(12) 0.0466(13) 0.0494(12) -0.0044(10) 0.0016(10) -0.0309(10) 
F14 0.0617(13) 0.0378(11) 0.0287(10) 0.0044(8) -0.0125(9) -0.0183(10) 
F15 0.0338(9) 0.0334(10) 0.0274(9) -0.0032(7) -0.0141(7) -0.0037(7) 
F16 0.0228(8) 0.0350(10) 0.0254(8) -0.0116(7) 0.0024(6) -0.0080(7) 
F17 0.0231(8) 0.0442(11) 0.0400(10) -0.0254(9) -0.0024(7) 0.0001(7) 
F18 0.0413(10) 0.0302(10) 0.0514(12) -0.0199(9) -0.0190(9) 0.0032(8) 
F19 0.0431(11) 0.0302(10) 0.0355(10) -0.0054(8) -0.0066(8) -0.0132(8) 
F20 0.0240(8) 0.0332(10) 0.0247(8) -0.0084(7) 0.0025(6) -0.0093(7) 
C1 0.0320(16) 0.045(2) 0.0424(18) -0.0096(16) -0.0131(14) -0.0135(14) 
C2 0.0296(16) 0.056(2) 0.0341(17) -0.0196(16) -0.0055(13) 0.0000(15) 
C3 0.0398(19) 0.063(3) 0.0347(18) 0.0078(17) -0.0072(15) -0.0298(18) 
C4 0.0307(17) 0.076(3) 0.0426(19) -0.0236(19) -0.0050(15) -0.0239(17) 
C5 0.0359(18) 0.056(2) 0.051(2) -0.0335(19) -0.0123(16) 0.0086(16) 
C6 0.043(2) 0.064(3) 0.060(3) -0.023(2) -0.0258(19) 0.0148(19) 
C7 0.0354(17) 0.0384(19) 0.0325(16) -0.0088(14) -0.0118(13) 0.0003(14) 
C8 0.0367(17) 0.046(2) 0.0216(14) -0.0117(14) 0.0004(12) -0.0118(14) 
C9 0.0426(18) 0.049(2) 0.0383(18) -0.0244(16) -0.0175(15) -0.0014(15) 
C10 0.045(2) 0.074(3) 0.0280(17) -0.0230(18) -0.0067(15) -0.0057(19) 
C11 0.043(2) 0.077(3) 0.0385(19) -0.0270(19) -0.0109(16) -0.0168(19) 
C12 0.054(2) 0.056(3) 0.0349(19) 0.0048(17) -0.0192(17) -0.0098(19) 
C13 0.0179(12) 0.0304(15) 0.0206(12) -0.0109(11) -0.0013(10) -0.0079(10) 
C14 0.0234(13) 0.0320(15) 0.0224(13) -0.0102(12) -0.0067(10) -0.0059(11) 
C15 0.0216(13) 0.0352(17) 0.0328(15) -0.0189(13) -0.0048(11) -0.0010(12) 
C16 0.0260(14) 0.0477(19) 0.0262(14) -0.0239(14) -0.0006(11) -0.0078(13) 
C17 0.0264(14) 0.0426(18) 0.0195(13) -0.0117(12) -0.0058(11) -0.0091(12) 
C18 0.0213(13) 0.0310(15) 0.0213(12) -0.0104(11) -0.0048(10) -0.0052(11) 
C19 0.0214(12) 0.0267(14) 0.0190(12) -0.0079(11) -0.0061(10) -0.0036(10) 
C20 0.0242(13) 0.0313(15) 0.0224(13) -0.0132(12) -0.0036(10) -0.0056(11) 
C21 0.0214(13) 0.0298(16) 0.0360(16) -0.0137(13) -0.0061(12) -0.0045(11) 
C22 0.0310(15) 0.0298(16) 0.0363(16) -0.0136(13) -0.0194(13) -0.0024(12) 
C23 0.0381(16) 0.0274(15) 0.0225(13) -0.0097(12) -0.0109(12) -0.0044(12) 
C24 0.0223(13) 0.0304(15) 0.0218(13) -0.0108(12) -0.0029(10) -0.0038(11) 
C25 0.0217(12) 0.0263(14) 0.0182(12) -0.0085(11) -0.0014(10) -0.0035(10) 
C26 0.0232(13) 0.0303(15) 0.0256(13) -0.0121(12) -0.0036(11) -0.0054(11) 
C27 0.0246(14) 0.0374(17) 0.0333(15) -0.0169(14) -0.0030(12) -0.0071(12) 
C28 0.0335(16) 0.0323(17) 0.0339(16) -0.0092(14) 0.0033(13) -0.0164(13) 
C29 0.0402(17) 0.0297(16) 0.0215(14) -0.0049(12) -0.0030(12) -0.0082(13) 
C30 0.0265(14) 0.0289(15) 0.0229(13) -0.0089(12) -0.0046(11) -0.0041(11) 
C31 0.0189(12) 0.0288(15) 0.0170(11) -0.0074(11) -0.0055(9) -0.0043(10) 
C32 0.0219(13) 0.0323(15) 0.0185(12) -0.0082(11) -0.0044(10) -0.0094(11) 
C33 0.0212(13) 0.0350(16) 0.0273(14) -0.0178(13) -0.0064(11) -0.0006(11) 
C34 0.0306(15) 0.0278(15) 0.0350(15) -0.0153(13) -0.0151(12) -0.0003(12) 
C35 0.0313(15) 0.0286(15) 0.0243(13) -0.0076(12) -0.0074(11) -0.0094(12) 
C36 0.0219(13) 0.0333(16) 0.0198(12) -0.0118(11) -0.0035(10) -0.0055(11) 
B1 0.0197(13) 0.0287(16) 0.0178(13) -0.0086(12) -0.0029(11) -0.0046(12) 
C37 0.056(4) 0.057(4) 0.064(3) -0.013(3) -0.013(3) 0.005(3) 
C38 0.044(2) 0.040(2) 0.069(3) -0.025(2) -0.030(2) 0.0088(17) 
C39 0.060(3) 0.036(2) 0.055(3) -0.020(3) -0.023(3) 0.007(2) 
C40 0.060(3) 0.033(3) 0.067(3) -0.015(3) -0.029(3) -0.004(2) 
C41 0.060(4) 0.061(4) 0.086(4) -0.032(3) -0.046(3) 0.002(3) 
C42 0.085(5) 0.080(5) 0.053(4) -0.022(3) -0.037(3) 0.015(4) 
C37' 0.056(4) 0.057(4) 0.064(3) -0.013(3) -0.013(3) 0.005(3) 
C38' 0.044(2) 0.040(2) 0.069(3) -0.025(2) -0.030(2) 0.0088(17) 
C39' 0.060(3) 0.036(2) 0.055(3) -0.020(3) -0.023(3) 0.007(2) 
C40' 0.060(3) 0.033(3) 0.067(3) -0.015(3) -0.029(3) -0.004(2) 
C41' 0.060(4) 0.061(4) 0.086(4) -0.032(3) -0.046(3) 0.002(3) 
C42' 0.085(5) 0.080(5) 0.053(4) -0.022(3) -0.037(3) 0.015(4) 
 
_geom_special_details 
; 
 All esds (except the esd in the dihedral angle between two l.s. planes) 
 are estimated using the full covariance matrix.  The cell esds are taken 
 into account individually in the estimation of esds in distances, angles 
 and torsion angles; correlations between esds in cell parameters are only 
 used when they are defined by crystal symmetry.  An approximate (isotropic) 
 treatment of cell esds is used for estimating esds involving l.s. planes. 
; 
 
loop_ 
 _geom_bond_atom_site_label_1 
 _geom_bond_atom_site_label_2 
 _geom_bond_distance 
 _geom_bond_site_symmetry_2 
 _geom_bond_publ_flag 
W1 C01 1.846(9) . ? 
W1 C02 1.885(8) . ? 
W1 Cl1 2.398(2) . ? 
W1 Cl2 2.415(2) . ? 
W1 P3 2.5280(8) . ? 
W1 P4 2.5301(8) . ? 
W1 P2 2.5347(9) . ? 
W1 P1 2.5430(9) . ? 
C01 H01 0.9500 . ? 
C02 H02 0.9500 . ? 
P1 C2 1.812(4) . ? 
P1 C3 1.823(3) . ? 
P1 C1 1.824(3) . ? 
P2 C4 1.806(4) . ? 
P2 C6 1.819(4) . ? 
P2 C5 1.827(3) . ? 
P3 C9 1.812(3) . ? 
P3 C8 1.818(3) . ? 
P3 C7 1.821(3) . ? 
P4 C12 1.814(4) . ? 
P4 C10 1.819(4) . ? 
P4 C11 1.821(4) . ? 
F1 C14 1.355(3) . ? 
F2 C15 1.351(3) . ? 
F3 C16 1.346(3) . ? 
F4 C17 1.345(3) . ? 
F5 C18 1.354(3) . ? 
F6 C20 1.353(3) . ? 
F7 C21 1.350(3) . ? 
F8 C22 1.339(3) . ? 
F9 C23 1.351(3) . ? 
F10 C24 1.358(3) . ? 
F11 C26 1.359(3) . ? 
F12 C27 1.347(3) . ? 
F13 C28 1.350(3) . ? 
F14 C29 1.350(4) . ? 
F15 C30 1.348(3) . ? 
F16 C32 1.359(3) . ? 
F17 C33 1.351(3) . ? 
F18 C34 1.347(3) . ? 
F19 C35 1.351(3) . ? 
F20 C36 1.354(3) . ? 
C1 H1A 0.9800 . ? 
C1 H1B 0.9800 . ? 
C1 H1C 0.9800 . ? 
C2 H2A 0.9800 . ? 
C2 H2B 0.9800 . ? 
C2 H2C 0.9800 . ? 
C3 H3A 0.9800 . ? 
C3 H3B 0.9800 . ? 
C3 H3C 0.9800 . ? 
C4 H4A 0.9800 . ? 
C4 H4B 0.9800 . ? 
C4 H4C 0.9800 . ? 
C5 H5A 0.9800 . ? 
C5 H5B 0.9800 . ? 
C5 H5C 0.9800 . ? 
C6 H6A 0.9800 . ? 
C6 H6B 0.9800 . ? 
C6 H6C 0.9800 . ? 
C7 H7A 0.9800 . ? 
C7 H7B 0.9800 . ? 
C7 H7C 0.9800 . ? 
C8 H8A 0.9800 . ? 
C8 H8B 0.9800 . ? 
C8 H8C 0.9800 . ? 
C9 H9A 0.9800 . ? 
C9 H9B 0.9800 . ? 
C9 H9C 0.9800 . ? 
C10 H10A 0.9800 . ? 
C10 H10B 0.9800 . ? 
C10 H10C 0.9800 . ? 
C11 H11A 0.9800 . ? 
C11 H11B 0.9800 . ? 
C11 H11C 0.9800 . ? 
C12 H12A 0.9800 . ? 
C12 H12B 0.9800 . ? 
C12 H12C 0.9800 . ? 
C13 C18 1.389(4) . ? 
C13 C14 1.391(4) . ? 
C13 B1 1.661(4) . ? 
C14 C15 1.378(4) . ? 
C15 C16 1.378(4) . ? 
C16 C17 1.371(5) . ? 
C17 C18 1.387(4) . ? 
C19 C20 1.389(4) . ? 
C19 C24 1.394(4) . ? 
C19 B1 1.650(4) . ? 
C20 C21 1.389(4) . ? 
C21 C22 1.366(4) . ? 
C22 C23 1.383(4) . ? 
C23 C24 1.376(4) . ? 
C25 C30 1.391(4) . ? 
C25 C26 1.394(4) . ? 
C25 B1 1.662(4) . ? 
C26 C27 1.377(4) . ? 
C27 C28 1.371(5) . ? 
C28 C29 1.372(5) . ? 
C29 C30 1.384(4) . ? 
C31 C32 1.391(4) . ? 
C31 C36 1.399(4) . ? 
C31 B1 1.650(4) . ? 
C32 C33 1.373(4) . ? 
C33 C34 1.374(4) . ? 
C34 C35 1.382(4) . ? 
C35 C36 1.371(4) . ? 
C37 C38 1.3900 . ? 
C37 C42 1.3900 . ? 
C37 D37 0.9500 . ? 
C38 C39 1.3900 . ? 
C38 D38 0.9500 . ? 
C39 C40 1.3900 . ? 
C39 D39 0.9500 . ? 
C40 C41 1.3900 . ? 
C40 D40 0.9500 . ? 
C41 C42 1.3900 . ? 
C41 D41 0.9500 . ? 
C42 D42 0.9500 . ? 
C37' C38' 1.3900 . ? 
C37' C42' 1.3900 . ? 
C37' D37' 0.9500 . ? 
C38' C39' 1.3900 . ? 
C38' D38' 0.9500 . ? 
C39' C40' 1.3900 . ? 
C39' D39' 0.9500 . ? 
C40' C41' 1.3900 . ? 
C40' D40' 0.9500 . ? 
C41' C42' 1.3900 . ? 
C41' D41' 0.9500 . ? 
C42' D42' 0.9500 . ? 
 
loop_ 
 _geom_angle_atom_site_label_1 
 _geom_angle_atom_site_label_2 
 _geom_angle_atom_site_label_3 
 _geom_angle 
 _geom_angle_site_symmetry_1 
 _geom_angle_site_symmetry_3 
 _geom_angle_publ_flag 
C01 W1 C02 177.2(5) . . ? 
C01 W1 Cl1 2.9(4) . . ? 
C02 W1 Cl1 179.1(4) . . ? 
C01 W1 Cl2 177.6(3) . . ? 
C02 W1 Cl2 1.0(4) . . ? 
Cl1 W1 Cl2 179.48(10) . . ? 
C01 W1 P3 84.2(3) . . ? 
C02 W1 P3 98.0(4) . . ? 
Cl1 W1 P3 82.63(6) . . ? 
Cl2 W1 P3 97.01(8) . . ? 
C01 W1 P4 80.6(3) . . ? 
C02 W1 P4 97.3(4) . . ? 
Cl1 W1 P4 82.08(6) . . ? 
Cl2 W1 P4 98.28(8) . . ? 
P3 W1 P4 164.70(3) . . ? 
C01 W1 P2 94.9(3) . . ? 
C02 W1 P2 83.2(4) . . ? 
Cl1 W1 P2 97.41(7) . . ? 
Cl2 W1 P2 82.96(8) . . ? 
P3 W1 P2 90.28(3) . . ? 
P4 W1 P2 92.31(3) . . ? 
C01 W1 P1 99.6(3) . . ? 
C02 W1 P1 82.3(4) . . ? 
Cl1 W1 P1 97.11(7) . . ? 
Cl2 W1 P1 82.51(7) . . ? 
P3 W1 P1 90.00(3) . . ? 
P4 W1 P1 91.26(3) . . ? 
P2 W1 P1 165.39(3) . . ? 
W1 C01 H01 180.0 . . ? 
W1 C02 H02 180.0 . . ? 
C2 P1 C3 104.31(19) . . ? 
C2 P1 C1 103.11(17) . . ? 
C3 P1 C1 98.84(17) . . ? 
C2 P1 W1 119.03(12) . . ? 
C3 P1 W1 113.81(13) . . ? 
C1 P1 W1 115.19(12) . . ? 
C4 P2 C6 103.5(2) . . ? 
C4 P2 C5 103.30(18) . . ? 
C6 P2 C5 98.80(19) . . ? 
C4 P2 W1 118.88(14) . . ? 
C6 P2 W1 114.37(15) . . ? 
C5 P2 W1 115.35(12) . . ? 
C9 P3 C8 105.03(16) . . ? 
C9 P3 C7 103.81(16) . . ? 
C8 P3 C7 97.65(17) . . ? 
C9 P3 W1 118.27(12) . . ? 
C8 P3 W1 112.92(11) . . ? 
C7 P3 W1 116.60(11) . . ? 
C12 P4 C10 103.8(2) . . ? 
C12 P4 C11 103.7(2) . . ? 
C10 P4 C11 99.09(19) . . ? 
C12 P4 W1 118.56(15) . . ? 
C10 P4 W1 114.81(12) . . ? 
C11 P4 W1 114.45(12) . . ? 
P1 C1 H1A 109.5 . . ? 
P1 C1 H1B 109.5 . . ? 
H1A C1 H1B 109.5 . . ? 
P1 C1 H1C 109.5 . . ? 
H1A C1 H1C 109.5 . . ? 
H1B C1 H1C 109.5 . . ? 
P1 C2 H2A 109.5 . . ? 
P1 C2 H2B 109.5 . . ? 
H2A C2 H2B 109.5 . . ? 
P1 C2 H2C 109.5 . . ? 
H2A C2 H2C 109.5 . . ? 
H2B C2 H2C 109.5 . . ? 
P1 C3 H3A 109.5 . . ? 
P1 C3 H3B 109.5 . . ? 
H3A C3 H3B 109.5 . . ? 
P1 C3 H3C 109.5 . . ? 
H3A C3 H3C 109.5 . . ? 
H3B C3 H3C 109.5 . . ? 
P2 C4 H4A 109.5 . . ? 
P2 C4 H4B 109.5 . . ? 
H4A C4 H4B 109.5 . . ? 
P2 C4 H4C 109.5 . . ? 
H4A C4 H4C 109.5 . . ? 
H4B C4 H4C 109.5 . . ? 
P2 C5 H5A 109.5 . . ? 
P2 C5 H5B 109.5 . . ? 
H5A C5 H5B 109.5 . . ? 
P2 C5 H5C 109.5 . . ? 
H5A C5 H5C 109.5 . . ? 
H5B C5 H5C 109.5 . . ? 
P2 C6 H6A 109.5 . . ? 
P2 C6 H6B 109.5 . . ? 
H6A C6 H6B 109.5 . . ? 
P2 C6 H6C 109.5 . . ? 
H6A C6 H6C 109.5 . . ? 
H6B C6 H6C 109.5 . . ? 
P3 C7 H7A 109.5 . . ? 
P3 C7 H7B 109.5 . . ? 
H7A C7 H7B 109.5 . . ? 
P3 C7 H7C 109.5 . . ? 
H7A C7 H7C 109.5 . . ? 
H7B C7 H7C 109.5 . . ? 
P3 C8 H8A 109.5 . . ? 
P3 C8 H8B 109.5 . . ? 
H8A C8 H8B 109.5 . . ? 
P3 C8 H8C 109.5 . . ? 
H8A C8 H8C 109.5 . . ? 
H8B C8 H8C 109.5 . . ? 
P3 C9 H9A 109.5 . . ? 
P3 C9 H9B 109.5 . . ? 
H9A C9 H9B 109.5 . . ? 
P3 C9 H9C 109.5 . . ? 
H9A C9 H9C 109.5 . . ? 
H9B C9 H9C 109.5 . . ? 
P4 C10 H10A 109.5 . . ? 
P4 C10 H10B 109.5 . . ? 
H10A C10 H10B 109.5 . . ? 
P4 C10 H10C 109.5 . . ? 
H10A C10 H10C 109.5 . . ? 
H10B C10 H10C 109.5 . . ? 
P4 C11 H11A 109.5 . . ? 
P4 C11 H11B 109.5 . . ? 
H11A C11 H11B 109.5 . . ? 
P4 C11 H11C 109.5 . . ? 
H11A C11 H11C 109.5 . . ? 
H11B C11 H11C 109.5 . . ? 
P4 C12 H12A 109.5 . . ? 
P4 C12 H12B 109.5 . . ? 
H12A C12 H12B 109.5 . . ? 
P4 C12 H12C 109.5 . . ? 
H12A C12 H12C 109.5 . . ? 
H12B C12 H12C 109.5 . . ? 
C18 C13 C14 113.3(2) . . ? 
C18 C13 B1 128.2(2) . . ? 
C14 C13 B1 118.4(2) . . ? 
F1 C14 C15 116.0(3) . . ? 
F1 C14 C13 119.5(2) . . ? 
C15 C14 C13 124.5(3) . . ? 
F2 C15 C14 121.2(3) . . ? 
F2 C15 C16 119.4(3) . . ? 
C14 C15 C16 119.4(3) . . ? 
F3 C16 C17 120.8(3) . . ? 
F3 C16 C15 120.2(3) . . ? 
C17 C16 C15 118.9(3) . . ? 
F4 C17 C16 120.0(3) . . ? 
F4 C17 C18 120.2(3) . . ? 
C16 C17 C18 119.8(3) . . ? 
F5 C18 C17 114.8(2) . . ? 
F5 C18 C13 121.3(2) . . ? 
C17 C18 C13 124.0(3) . . ? 
C20 C19 C24 112.5(2) . . ? 
C20 C19 B1 127.0(2) . . ? 
C24 C19 B1 120.2(2) . . ? 
F6 C20 C19 121.5(2) . . ? 
F6 C20 C21 114.6(2) . . ? 
C19 C20 C21 123.9(3) . . ? 
F7 C21 C22 119.9(3) . . ? 
F7 C21 C20 119.4(3) . . ? 
C22 C21 C20 120.7(3) . . ? 
F8 C22 C21 121.4(3) . . ? 
F8 C22 C23 120.5(3) . . ? 
C21 C22 C23 118.1(3) . . ? 
F9 C23 C24 120.7(3) . . ? 
F9 C23 C22 119.9(3) . . ? 
C24 C23 C22 119.4(3) . . ? 
F10 C24 C23 116.3(2) . . ? 
F10 C24 C19 118.4(2) . . ? 
C23 C24 C19 125.3(3) . . ? 
C30 C25 C26 112.8(3) . . ? 
C30 C25 B1 128.6(2) . . ? 
C26 C25 B1 118.7(2) . . ? 
F11 C26 C27 115.5(3) . . ? 
F11 C26 C25 119.1(2) . . ? 
C27 C26 C25 125.3(3) . . ? 
F12 C27 C28 120.0(3) . . ? 
F12 C27 C26 121.2(3) . . ? 
C28 C27 C26 118.8(3) . . ? 
F13 C28 C27 120.5(3) . . ? 
F13 C28 C29 120.4(3) . . ? 
C27 C28 C29 119.1(3) . . ? 
F14 C29 C28 120.1(3) . . ? 
F14 C29 C30 119.9(3) . . ? 
C28 C29 C30 120.1(3) . . ? 
F15 C30 C29 115.1(3) . . ? 
F15 C30 C25 121.2(3) . . ? 
C29 C30 C25 123.7(3) . . ? 
C32 C31 C36 112.4(3) . . ? 
C32 C31 B1 127.3(2) . . ? 
C36 C31 B1 119.9(2) . . ? 
F16 C32 C33 114.6(2) . . ? 
F16 C32 C31 120.7(3) . . ? 
C33 C32 C31 124.7(3) . . ? 
F17 C33 C32 120.7(3) . . ? 
F17 C33 C34 119.5(3) . . ? 
C32 C33 C34 119.8(3) . . ? 
F18 C34 C33 120.9(3) . . ? 
F18 C34 C35 120.5(3) . . ? 
C33 C34 C35 118.6(3) . . ? 
F19 C35 C36 121.7(3) . . ? 
F19 C35 C34 119.0(3) . . ? 
C36 C35 C34 119.4(3) . . ? 
F20 C36 C35 116.4(2) . . ? 
F20 C36 C31 118.7(2) . . ? 
C35 C36 C31 124.9(3) . . ? 
C31 B1 C19 102.9(2) . . ? 
C31 B1 C13 114.5(2) . . ? 
C19 B1 C13 112.1(2) . . ? 
C31 B1 C25 111.3(2) . . ? 
C19 B1 C25 114.4(2) . . ? 
C13 B1 C25 102.0(2) . . ? 
C38 C37 C42 120.0 . . ? 
C38 C37 D37 120.0 . . ? 
C42 C37 D37 120.0 . . ? 
C37 C38 C39 120.0 . . ? 
C37 C38 D38 120.0 . . ? 
C39 C38 D38 120.0 . . ? 
C40 C39 C38 120.0 . . ? 
C40 C39 D39 120.0 . . ? 
C38 C39 D39 120.0 . . ? 
C39 C40 C41 120.0 . . ? 
C39 C40 D40 120.0 . . ? 
C41 C40 D40 120.0 . . ? 
C42 C41 C40 120.0 . . ? 
C42 C41 D41 120.0 . . ? 
C40 C41 D41 120.0 . . ? 
C41 C42 C37 120.0 . . ? 
C41 C42 D42 120.0 . . ? 
C37 C42 D42 120.0 . . ? 
C38' C37' C42' 120.0 . . ? 
C38' C37' D37' 120.0 . . ? 
C42' C37' D37' 120.0 . . ? 
C39' C38' C37' 120.0 . . ? 
C39' C38' D38' 120.0 . . ? 
C37' C38' D38' 120.0 . . ? 
C40' C39' C38' 120.0 . . ? 
C40' C39' D39' 120.0 . . ? 
C38' C39' D39' 120.0 . . ? 
C39' C40' C41' 120.0 . . ? 
C39' C40' D40' 120.0 . . ? 
C41' C40' D40' 120.0 . . ? 
C40' C41' C42' 120.0 . . ? 
C40' C41' D41' 120.0 . . ? 
C42' C41' D41' 120.0 . . ? 
C41' C42' C37' 120.0 . . ? 
C41' C42' D42' 120.0 . . ? 
C37' C42' D42' 120.0 . . ? 
 
loop_ 
 _geom_torsion_atom_site_label_1 
 _geom_torsion_atom_site_label_2 
 _geom_torsion_atom_site_label_3 
 _geom_torsion_atom_site_label_4 
 _geom_torsion 
 _geom_torsion_site_symmetry_1 
 _geom_torsion_site_symmetry_2 
 _geom_torsion_site_symmetry_3 
 _geom_torsion_site_symmetry_4 
 _geom_torsion_publ_flag 
C01 W1 P1 C2 -1.6(4) . . . . ? 
C02 W1 P1 C2 -179.5(4) . . . . ? 
Cl1 W1 P1 C2 -0.11(14) . . . . ? 
Cl2 W1 P1 C2 179.53(15) . . . . ? 
P3 W1 P1 C2 82.46(13) . . . . ? 
P4 W1 P1 C2 -82.29(13) . . . . ? 
P2 W1 P1 C2 173.58(15) . . . . ? 
C01 W1 P1 C3 122.0(4) . . . . ? 
C02 W1 P1 C3 -55.8(4) . . . . ? 
Cl1 W1 P1 C3 123.53(18) . . . . ? 
Cl2 W1 P1 C3 -56.83(18) . . . . ? 
P3 W1 P1 C3 -153.90(17) . . . . ? 
P4 W1 P1 C3 41.35(17) . . . . ? 
P2 W1 P1 C3 -62.8(2) . . . . ? 
C01 W1 P1 C1 -124.8(4) . . . . ? 
C02 W1 P1 C1 57.3(4) . . . . ? 
Cl1 W1 P1 C1 -123.32(14) . . . . ? 
Cl2 W1 P1 C1 56.32(15) . . . . ? 
P3 W1 P1 C1 -40.75(13) . . . . ? 
P4 W1 P1 C1 154.50(13) . . . . ? 
P2 W1 P1 C1 50.37(18) . . . . ? 
C01 W1 P2 C4 0.6(4) . . . . ? 
C02 W1 P2 C4 178.4(4) . . . . ? 
Cl1 W1 P2 C4 -0.98(15) . . . . ? 
Cl2 W1 P2 C4 179.39(16) . . . . ? 
P3 W1 P2 C4 -83.58(14) . . . . ? 
P4 W1 P2 C4 81.34(14) . . . . ? 
P1 W1 P2 C4 -174.66(16) . . . . ? 
C01 W1 P2 C6 -122.3(4) . . . . ? 
C02 W1 P2 C6 55.5(4) . . . . ? 
Cl1 W1 P2 C6 -123.86(18) . . . . ? 
Cl2 W1 P2 C6 56.51(19) . . . . ? 
P3 W1 P2 C6 153.54(17) . . . . ? 
P4 W1 P2 C6 -41.55(17) . . . . ? 
P1 W1 P2 C6 62.5(2) . . . . ? 
C01 W1 P2 C5 124.1(4) . . . . ? 
C02 W1 P2 C5 -58.1(4) . . . . ? 
Cl1 W1 P2 C5 122.53(16) . . . . ? 
Cl2 W1 P2 C5 -57.10(17) . . . . ? 
P3 W1 P2 C5 39.93(15) . . . . ? 
P4 W1 P2 C5 -155.16(15) . . . . ? 
P1 W1 P2 C5 -51.16(19) . . . . ? 
C01 W1 P3 C9 -173.8(4) . . . . ? 
C02 W1 P3 C9 4.3(4) . . . . ? 
Cl1 W1 P3 C9 -176.30(15) . . . . ? 
Cl2 W1 P3 C9 4.07(15) . . . . ? 
P4 W1 P3 C9 -178.71(15) . . . . ? 
P2 W1 P3 C9 -78.87(14) . . . . ? 
P1 W1 P3 C9 86.52(14) . . . . ? 
C01 W1 P3 C8 -50.7(4) . . . . ? 
C02 W1 P3 C8 127.5(4) . . . . ? 
Cl1 W1 P3 C8 -53.14(14) . . . . ? 
Cl2 W1 P3 C8 127.23(14) . . . . ? 
P4 W1 P3 C8 -55.55(16) . . . . ? 
P2 W1 P3 C8 44.29(13) . . . . ? 
P1 W1 P3 C8 -150.32(13) . . . . ? 
C01 W1 P3 C7 61.3(4) . . . . ? 
C02 W1 P3 C7 -120.6(4) . . . . ? 
Cl1 W1 P3 C7 58.78(15) . . . . ? 
Cl2 W1 P3 C7 -120.85(15) . . . . ? 
P4 W1 P3 C7 56.37(17) . . . . ? 
P2 W1 P3 C7 156.21(14) . . . . ? 
P1 W1 P3 C7 -38.40(14) . . . . ? 
C01 W1 P4 C12 178.0(4) . . . . ? 
C02 W1 P4 C12 -0.1(4) . . . . ? 
Cl1 W1 P4 C12 -179.45(17) . . . . ? 
Cl2 W1 P4 C12 0.17(17) . . . . ? 
P3 W1 P4 C12 -177.04(17) . . . . ? 
P2 W1 P4 C12 83.39(16) . . . . ? 
P1 W1 P4 C12 -82.45(16) . . . . ? 
C01 W1 P4 C10 -58.5(4) . . . . ? 
C02 W1 P4 C10 123.3(4) . . . . ? 
Cl1 W1 P4 C10 -56.02(17) . . . . ? 
Cl2 W1 P4 C10 123.60(17) . . . . ? 
P3 W1 P4 C10 -53.61(19) . . . . ? 
P2 W1 P4 C10 -153.18(16) . . . . ? 
P1 W1 P4 C10 40.99(16) . . . . ? 
C01 W1 P4 C11 55.1(4) . . . . ? 
C02 W1 P4 C11 -123.0(4) . . . . ? 
Cl1 W1 P4 C11 57.65(17) . . . . ? 
Cl2 W1 P4 C11 -122.73(18) . . . . ? 
P3 W1 P4 C11 60.06(19) . . . . ? 
P2 W1 P4 C11 -39.51(16) . . . . ? 
P1 W1 P4 C11 154.66(16) . . . . ? 
C18 C13 C14 F1 -179.6(2) . . . . ? 
B1 C13 C14 F1 -3.8(4) . . . . ? 
C18 C13 C14 C15 0.8(4) . . . . ? 
B1 C13 C14 C15 176.7(3) . . . . ? 
F1 C14 C15 F2 0.8(4) . . . . ? 
C13 C14 C15 F2 -179.6(3) . . . . ? 
F1 C14 C15 C16 -179.8(3) . . . . ? 
C13 C14 C15 C16 -0.2(5) . . . . ? 
F2 C15 C16 F3 0.1(4) . . . . ? 
C14 C15 C16 F3 -179.4(3) . . . . ? 
F2 C15 C16 C17 179.8(3) . . . . ? 
C14 C15 C16 C17 0.4(4) . . . . ? 
F3 C16 C17 F4 0.1(4) . . . . ? 
C15 C16 C17 F4 -179.6(3) . . . . ? 
F3 C16 C17 C18 178.6(3) . . . . ? 
C15 C16 C17 C18 -1.1(4) . . . . ? 
F4 C17 C18 F5 1.5(4) . . . . ? 
C16 C17 C18 F5 -177.0(3) . . . . ? 
F4 C17 C18 C13 -179.7(3) . . . . ? 
C16 C17 C18 C13 1.9(4) . . . . ? 
C14 C13 C18 F5 177.1(2) . . . . ? 
B1 C13 C18 F5 1.8(4) . . . . ? 
C14 C13 C18 C17 -1.6(4) . . . . ? 
B1 C13 C18 C17 -177.0(3) . . . . ? 
C24 C19 C20 F6 -178.3(3) . . . . ? 
B1 C19 C20 F6 -4.0(5) . . . . ? 
C24 C19 C20 C21 2.0(4) . . . . ? 
B1 C19 C20 C21 176.2(3) . . . . ? 
F6 C20 C21 F7 -1.8(4) . . . . ? 
C19 C20 C21 F7 177.9(3) . . . . ? 
F6 C20 C21 C22 -179.8(3) . . . . ? 
C19 C20 C21 C22 0.0(5) . . . . ? 
F7 C21 C22 F8 2.0(5) . . . . ? 
C20 C21 C22 F8 179.9(3) . . . . ? 
F7 C21 C22 C23 -179.1(3) . . . . ? 
C20 C21 C22 C23 -1.2(5) . . . . ? 
F8 C22 C23 F9 -1.0(4) . . . . ? 
C21 C22 C23 F9 -179.9(3) . . . . ? 
F8 C22 C23 C24 179.1(3) . . . . ? 
C21 C22 C23 C24 0.2(5) . . . . ? 
F9 C23 C24 F10 2.1(4) . . . . ? 
C22 C23 C24 F10 -178.0(3) . . . . ? 
F9 C23 C24 C19 -177.8(3) . . . . ? 
C22 C23 C24 C19 2.1(5) . . . . ? 
C20 C19 C24 F10 177.0(3) . . . . ? 
B1 C19 C24 F10 2.4(4) . . . . ? 
C20 C19 C24 C23 -3.1(4) . . . . ? 
B1 C19 C24 C23 -177.8(3) . . . . ? 
C30 C25 C26 F11 -179.1(2) . . . . ? 
B1 C25 C26 F11 -0.6(4) . . . . ? 
C30 C25 C26 C27 3.7(4) . . . . ? 
B1 C25 C26 C27 -177.9(3) . . . . ? 
F11 C26 C27 F12 1.5(4) . . . . ? 
C25 C26 C27 F12 178.9(3) . . . . ? 
F11 C26 C27 C28 -178.0(3) . . . . ? 
C25 C26 C27 C28 -0.6(5) . . . . ? 
F12 C27 C28 F13 -1.3(5) . . . . ? 
C26 C27 C28 F13 178.2(3) . . . . ? 
F12 C27 C28 C29 178.8(3) . . . . ? 
C26 C27 C28 C29 -1.7(5) . . . . ? 
F13 C28 C29 F14 0.5(5) . . . . ? 
C27 C28 C29 F14 -179.5(3) . . . . ? 
F13 C28 C29 C30 -179.2(3) . . . . ? 
C27 C28 C29 C30 0.7(5) . . . . ? 
F14 C29 C30 F15 2.4(4) . . . . ? 
C28 C29 C30 F15 -177.8(3) . . . . ? 
F14 C29 C30 C25 -176.9(3) . . . . ? 
C28 C29 C30 C25 2.8(5) . . . . ? 
C26 C25 C30 F15 175.9(2) . . . . ? 
B1 C25 C30 F15 -2.3(4) . . . . ? 
C26 C25 C30 C29 -4.7(4) . . . . ? 
B1 C25 C30 C29 177.0(3) . . . . ? 
C36 C31 C32 F16 -177.1(2) . . . . ? 
B1 C31 C32 F16 -3.8(4) . . . . ? 
C36 C31 C32 C33 3.0(4) . . . . ? 
B1 C31 C32 C33 176.2(3) . . . . ? 
F16 C32 C33 F17 0.6(4) . . . . ? 
C31 C32 C33 F17 -179.4(2) . . . . ? 
F16 C32 C33 C34 -179.7(2) . . . . ? 
C31 C32 C33 C34 0.3(4) . . . . ? 
F17 C33 C34 F18 -2.5(4) . . . . ? 
C32 C33 C34 F18 177.9(2) . . . . ? 
F17 C33 C34 C35 176.8(2) . . . . ? 
C32 C33 C34 C35 -2.9(4) . . . . ? 
F18 C34 C35 F19 1.1(4) . . . . ? 
C33 C34 C35 F19 -178.2(2) . . . . ? 
F18 C34 C35 C36 -178.7(2) . . . . ? 
C33 C34 C35 C36 2.1(4) . . . . ? 
F19 C35 C36 F20 1.1(4) . . . . ? 
C34 C35 C36 F20 -179.2(2) . . . . ? 
F19 C35 C36 C31 -178.3(2) . . . . ? 
C34 C35 C36 C31 1.4(4) . . . . ? 
C32 C31 C36 F20 176.8(2) . . . . ? 
B1 C31 C36 F20 3.0(4) . . . . ? 
C32 C31 C36 C35 -3.8(4) . . . . ? 
B1 C31 C36 C35 -177.7(3) . . . . ? 
C32 C31 B1 C19 -106.7(3) . . . . ? 
C36 C31 B1 C19 66.1(3) . . . . ? 
C32 C31 B1 C13 131.4(3) . . . . ? 
C36 C31 B1 C13 -55.8(3) . . . . ? 
C32 C31 B1 C25 16.3(4) . . . . ? 
C36 C31 B1 C25 -170.9(2) . . . . ? 
C20 C19 B1 C31 -108.4(3) . . . . ? 
C24 C19 B1 C31 65.4(3) . . . . ? 
C20 C19 B1 C13 15.1(4) . . . . ? 
C24 C19 B1 C13 -171.0(3) . . . . ? 
C20 C19 B1 C25 130.7(3) . . . . ? 
C24 C19 B1 C25 -55.5(4) . . . . ? 
C18 C13 B1 C31 -9.9(4) . . . . ? 
C14 C13 B1 C31 174.9(2) . . . . ? 
C18 C13 B1 C19 -126.7(3) . . . . ? 
C14 C13 B1 C19 58.1(3) . . . . ? 
C18 C13 B1 C25 110.4(3) . . . . ? 
C14 C13 B1 C25 -64.8(3) . . . . ? 
C30 C25 B1 C31 -121.9(3) . . . . ? 
C26 C25 B1 C31 59.9(3) . . . . ? 
C30 C25 B1 C19 -5.8(4) . . . . ? 
C26 C25 B1 C19 176.1(2) . . . . ? 
C30 C25 B1 C13 115.5(3) . . . . ? 
C26 C25 B1 C13 -62.6(3) . . . . ? 
C42 C37 C38 C39 0.0 . . . . ? 
C37 C38 C39 C40 0.0 . . . . ? 
C38 C39 C40 C41 0.0 . . . . ? 
C39 C40 C41 C42 0.0 . . . . ? 
C40 C41 C42 C37 0.0 . . . . ? 
C38 C37 C42 C41 0.0 . . . . ? 
C42' C37' C38' C39' 0.0 . . . . ? 
C37' C38' C39' C40' 0.0 . . . . ? 
C38' C39' C40' C41' 0.0 . . . . ? 
C39' C40' C41' C42' 0.0 . . . . ? 
C40' C41' C42' C37' 0.0 . . . . ? 
C38' C37' C42' C41' 0.0 . . . . ? 
 
loop_ 
 _geom_hbond_atom_site_label_D 
 _geom_hbond_atom_site_label_H 
 _geom_hbond_atom_site_label_A 
 _geom_hbond_distance_DH 
 _geom_hbond_distance_HA 
 _geom_hbond_distance_DA 
 _geom_hbond_angle_DHA 
 _geom_hbond_site_symmetry_A 
C01 H01 Cl1  0.95 2.89 3.503(9) 123.1 2_665 
C02 H02 Cl2  0.95 2.87 3.562(10) 131.0 2_675 
 
_diffrn_measured_fraction_theta_max    0.994 
_diffrn_reflns_theta_full              30.00 
_diffrn_measured_fraction_theta_full   0.994 
_refine_diff_density_max    1.044 
_refine_diff_density_min   -1.071 
_refine_diff_density_rms    0.098 
